# Supplementary material for: Fluorescence ‘on–off–on’ chemosensor for the sequential recognition of Hg2+and cysteine in water
Source: Royal Society of Chemistry journal article supplement (doi:10.1039/c5ra06601h), 2015-01-01
Supplement: c5ra06601h1.pdf [file c5ra06601h1.pdf]

## Supporting Information

### Fluorescence ‘on-off-on’ chemosensor for the sequential recognition of Hg<sup>2+</sup> and Cys in water

Ye Won Choi, Jae Jun Lee, Ga Rim You, Cheal Kim\*

*Department of Fine Chemistry and Department of Interdisciplinary Bio IT Materials, Seoul National University of Science and Technology, Seoul 139-743, Korea. Fax: +82-2-973-9149; Tel: +82-2-970-6693; E-mail: chealkim@seoultech.ac.kr*

**Table S1.** Examples for the sequential detection of Hg<sup>2+</sup> and Cys by organic chemosensors

| Sensor                                                                              | Detection Limit ( $\mu\text{M}$ ) | Interference | Percent of water in solution | Method of detection    | Analyte               | Reference |
|-------------------------------------------------------------------------------------|-----------------------------------|--------------|------------------------------|------------------------|-----------------------|-----------|
| 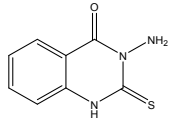   | 0.35                              | No data      | 90%                          | Fluorescence           | Cys                   | 59        |
|    | No data                           | No data      | 33.3%                        | Fluorescence<br>UV-vis | Cys, Hcy,<br>GSH, His | 60        |
|    | $9.6 \times 10^{-5}$              | None         | 99%                          | Fluorescence           | Cys                   | 61        |
|    | 0.037                             | None         | 70%                          | Fluorescence<br>UV-vis | Cys                   | 62        |
|  | 0.091                             | None         | 33.3%                        | Fluorescence<br>UV-vis | Cys                   | 63        |
|  | 1.0                               | None         | 30%                          | Fluorescence<br>UV-vis | Cys                   | 64        |
|  | 5.2                               | None         | 99%                          | Fluorescence           | Cys                   | This work |

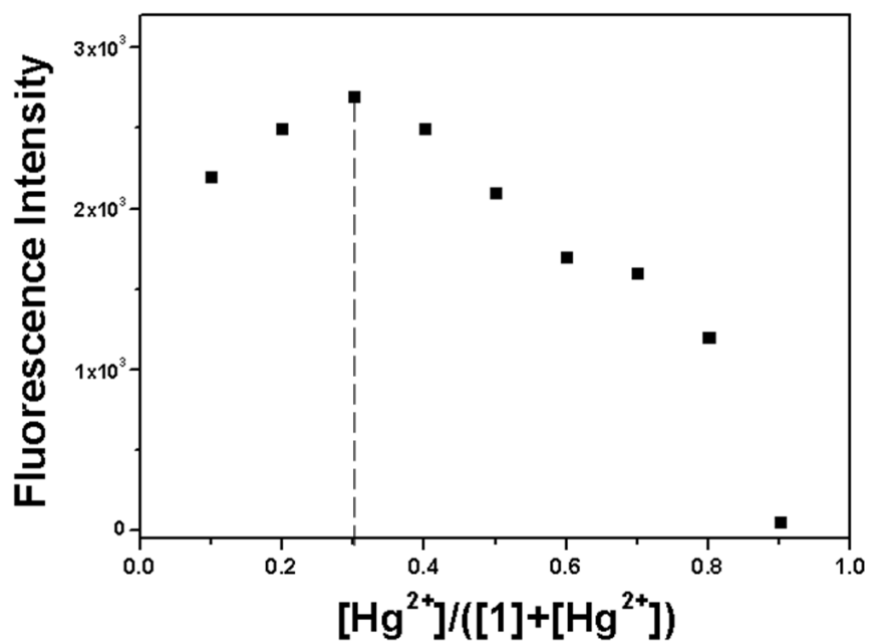

**Fig. S1** Job plot of **1** and Hg<sup>2+</sup> in bis-tris buffer solution (10 mM, pH 7.0). The total concentrations of **1** and Hg<sup>2+</sup> were 100 μM.

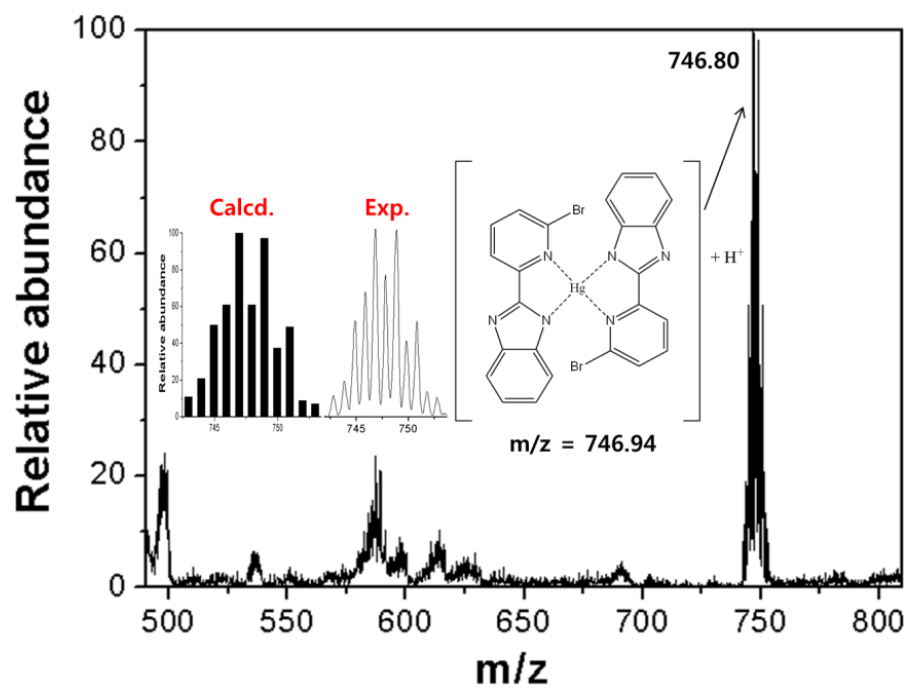

**Fig. S2** Positive-ion electrospray ionization mass spectrum of **1** (100  $\mu\text{M}$ ) upon addition of 0.5 equiv of  $\text{Hg}(\text{NO}_3)_2$ .

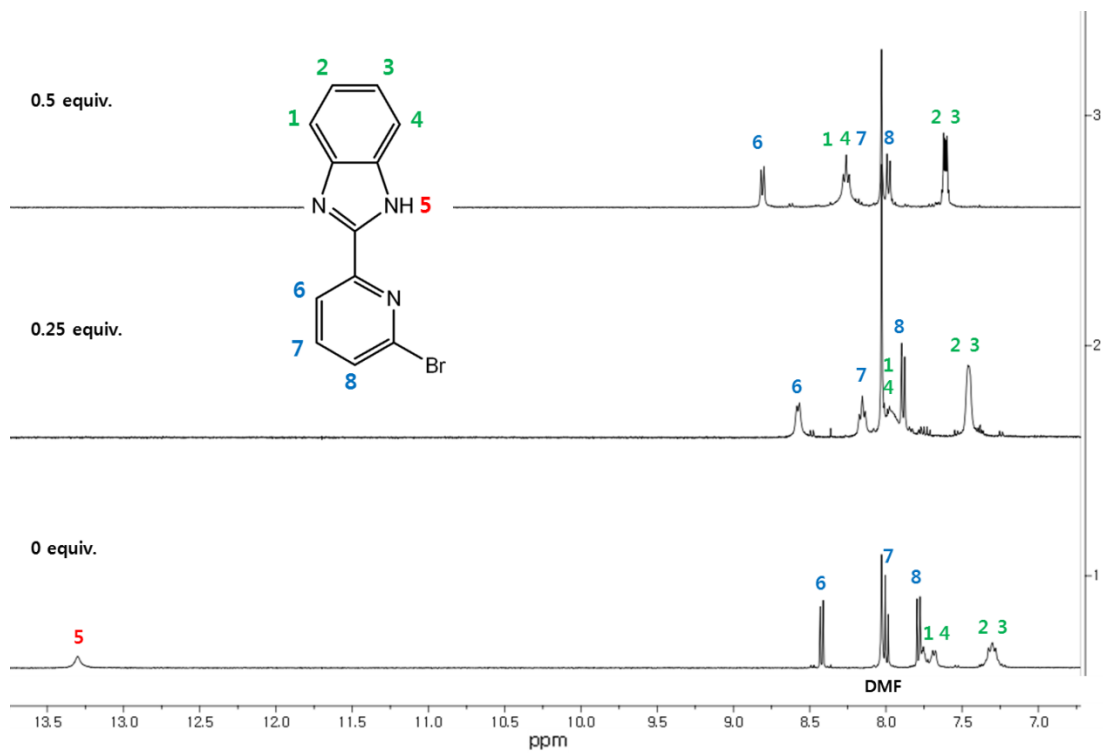

**Fig. S3** <sup>1</sup>H NMR titration of **1** with Hg<sup>2+</sup>.

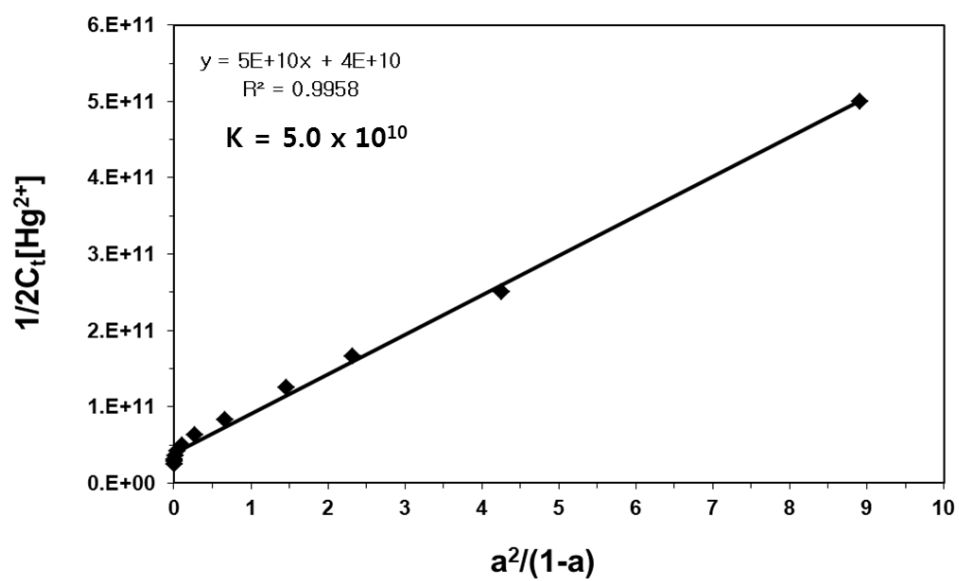

**Fig. S4** Li's equation of **1** (at 395 nm), assuming 1:2 stoichiometry for association between  $\text{Hg}^{2+}$  and **1**.

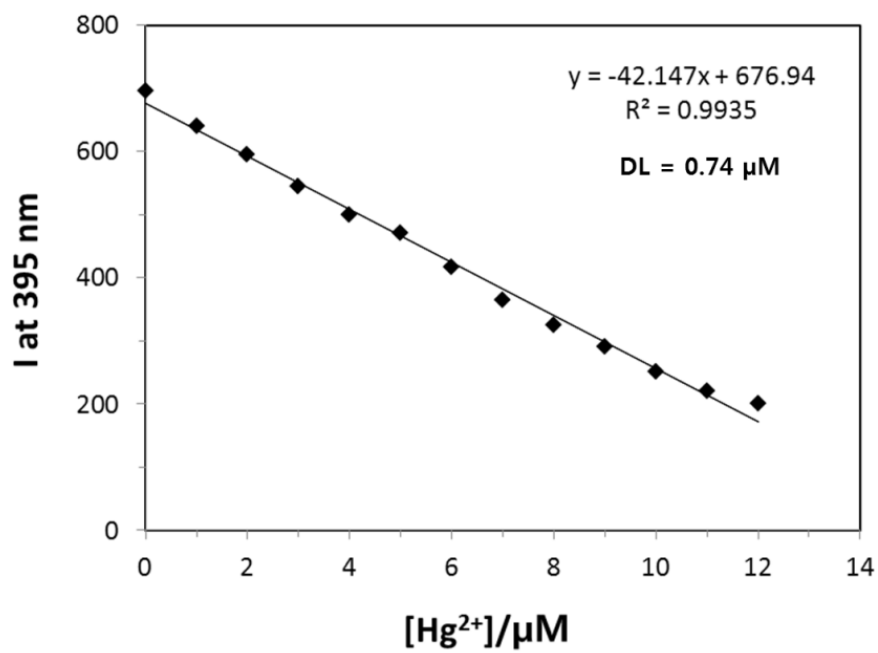

**Fig. S5** Detection limit of **1** (1 μM) for Hg<sup>2+</sup> through change of fluorescence intensity.

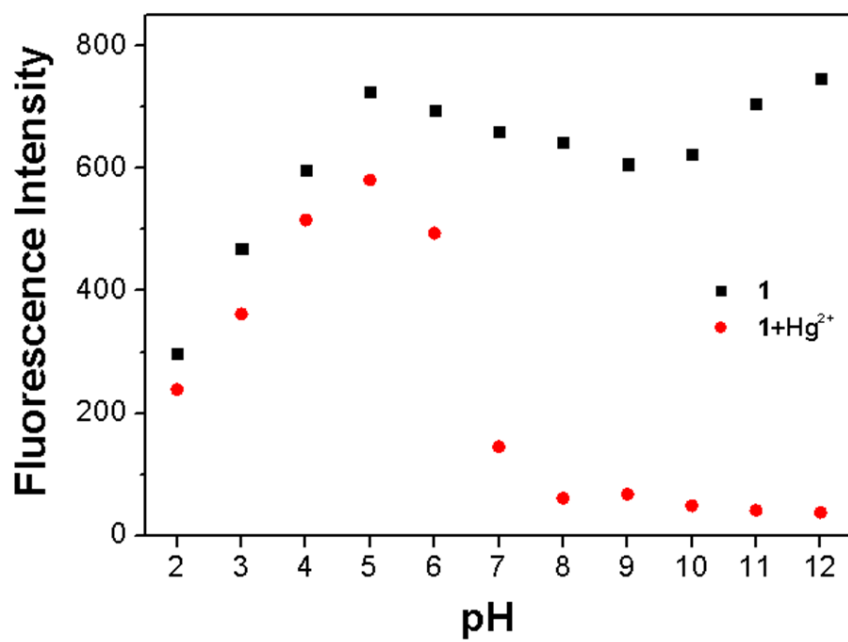

**Fig. S6** Fluorescence intensities of **1** upon addition of 25 equiv of Hg<sup>2+</sup> at various range of pH.



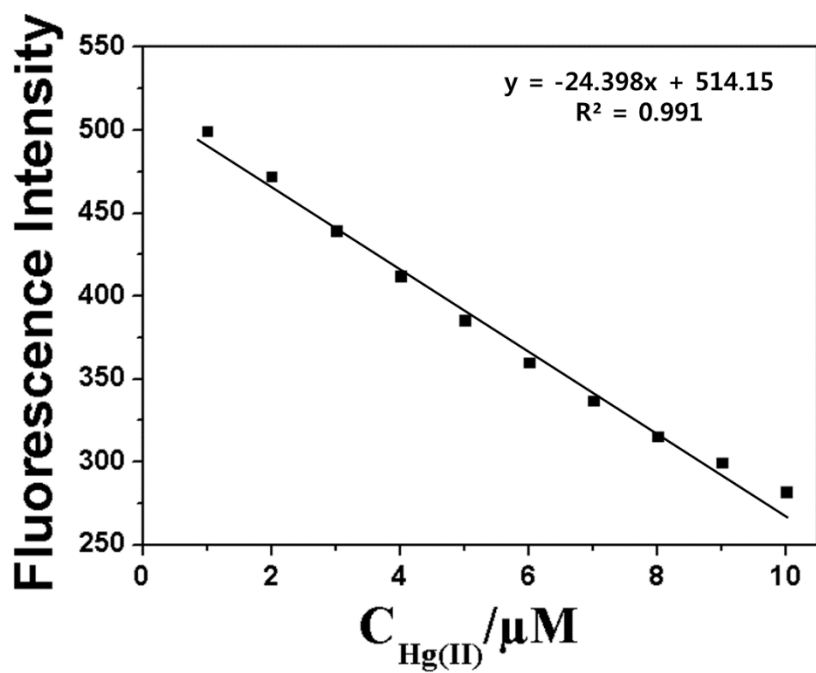

**Fig. S7** Fluorescence intensity (at 395 nm) of **1** as a function of Hg<sup>2+</sup> concentration ([**1**] = 1 μmol/L and [Hg<sup>2+</sup>] = 1.0-10.0 μmol/L).

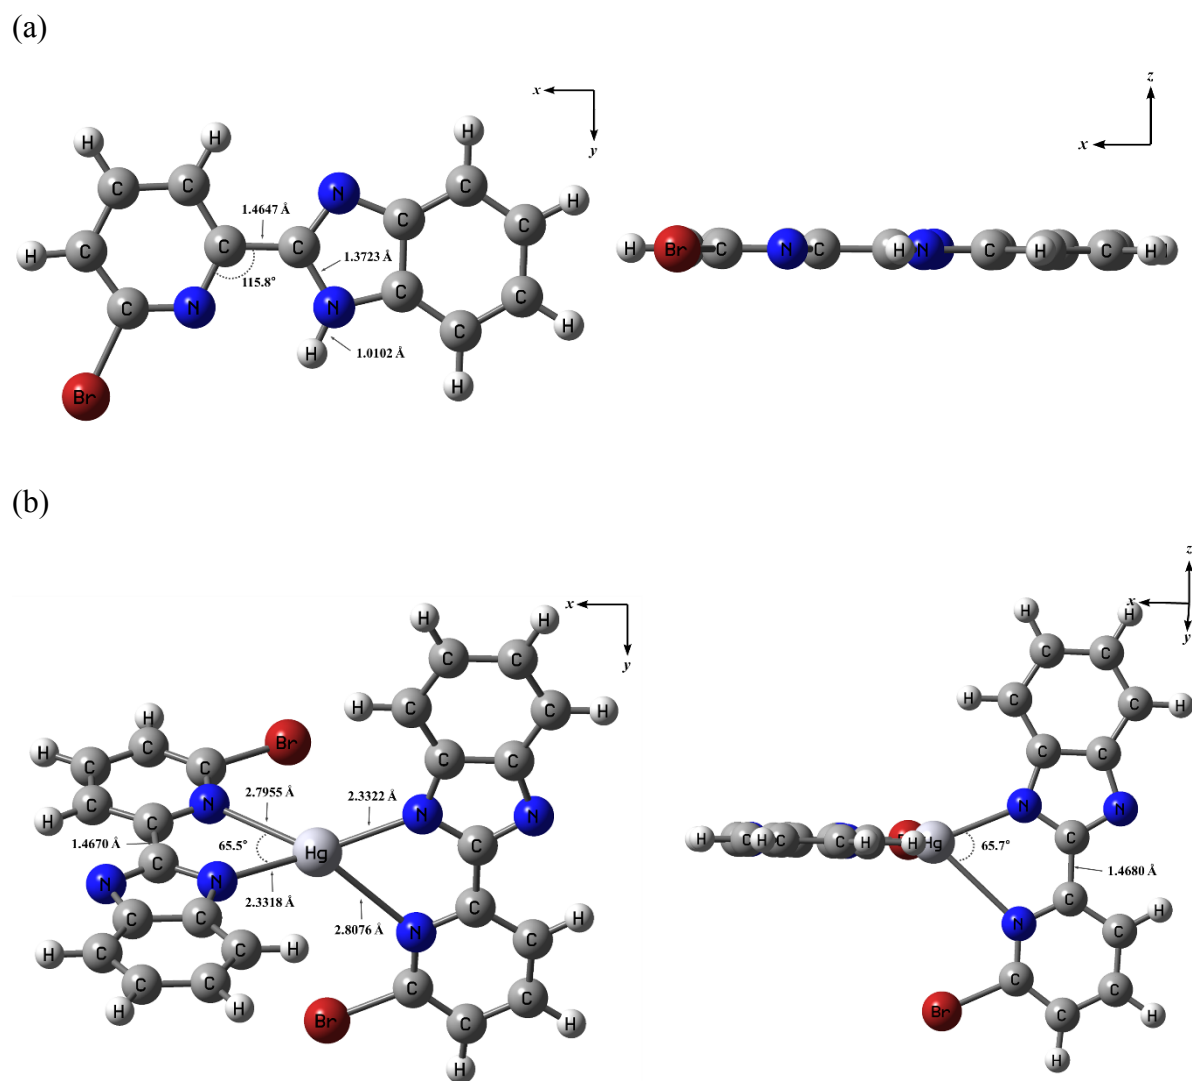

**Fig. S8** The energy-minimized structures of (a) **1** and (b)  $\text{Hg}^{2+}\cdot 2\cdot \mathbf{1}$ .

(a)

| Excited State 1 | Wavelength | Percent (%) | Oscillator strength |
|-----------------|------------|-------------|---------------------|
| H → L           | 317.90 nm  | 96%         | 0.7856              |
| H-1 → L         |            | 2%          |                     |
| Excited State 2 | Wavelength | Percent (%) | Oscillator strength |
| H-1 → L         | 307.43 nm  | 96%         | 0.0238              |
| H → L           |            | 2%          |                     |

(b)

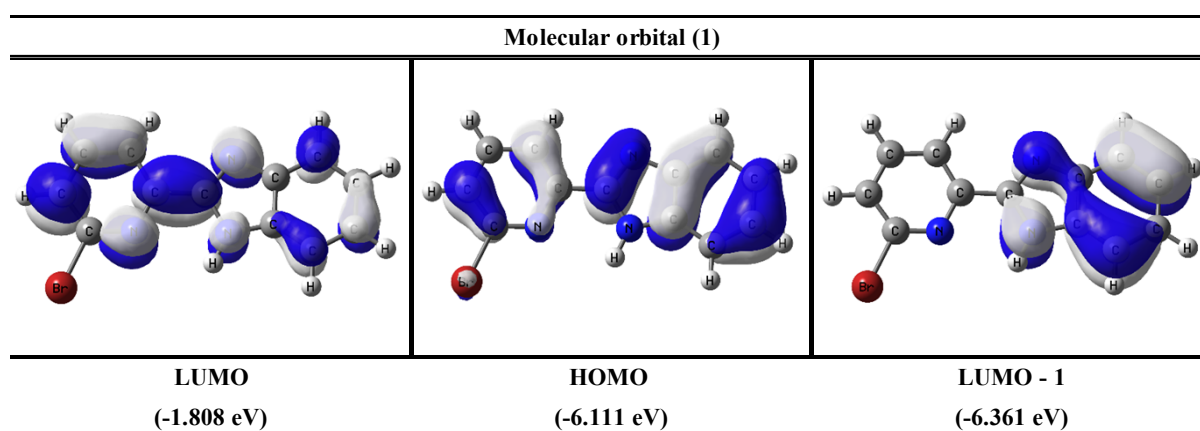

**Fig. S9** (a) The major electronic transition energies and molecular orbital contributions for **1** (H = HOMO and L = LUMO). (b) Isosurface (0.030 electron bohr<sup>-3</sup>) of molecular orbitals participating in the major singlet excited states of **1**.

(a)

| <b>Excited State 1</b> | <b>Wavelength</b> | <b>Percent (%)</b> | <b>Oscillator strength</b> |
|------------------------|-------------------|--------------------|----------------------------|
| H-1 → L                | 342.03 nm         | 36%                | 0.4211                     |
| H-2 → L                |                   | 20%                |                            |
| H-3 → L                |                   | 11%                |                            |
| H-3 → L+1              |                   | 9%                 |                            |
| H-1 → L+1              |                   | 8%                 |                            |
| H → L                  |                   | 7%                 |                            |
| H → L+1                |                   | 5%                 |                            |

  

| <b>Excited State 2</b> | <b>Wavelength</b> | <b>Percent (%)</b> | <b>Oscillator strength</b> |
|------------------------|-------------------|--------------------|----------------------------|
| H → L+1                | 341.05 nm         | 36%                | 0.4556                     |
| H-2 → L+1              |                   | 23%                |                            |
| H-3 → L                |                   | 14%                |                            |
| H-1 → L                |                   | 10%                |                            |
| H-3 → L+1              |                   | 8%                 |                            |
| H → L                  |                   | 6%                 |                            |

  

| <b>Excited State 3</b> | <b>Wavelength</b> | <b>Percent (%)</b> | <b>Oscillator strength</b> |
|------------------------|-------------------|--------------------|----------------------------|
| H-1 → L                | 338.24 nm         | 33%                | 0.2312                     |
| H-3 → L                |                   | 28%                |                            |
| H-2 → L+1              |                   | 16%                |                            |
| H → L+1                |                   | 11%                |                            |
| H-2 → L                |                   | 9%                 |                            |

(b)

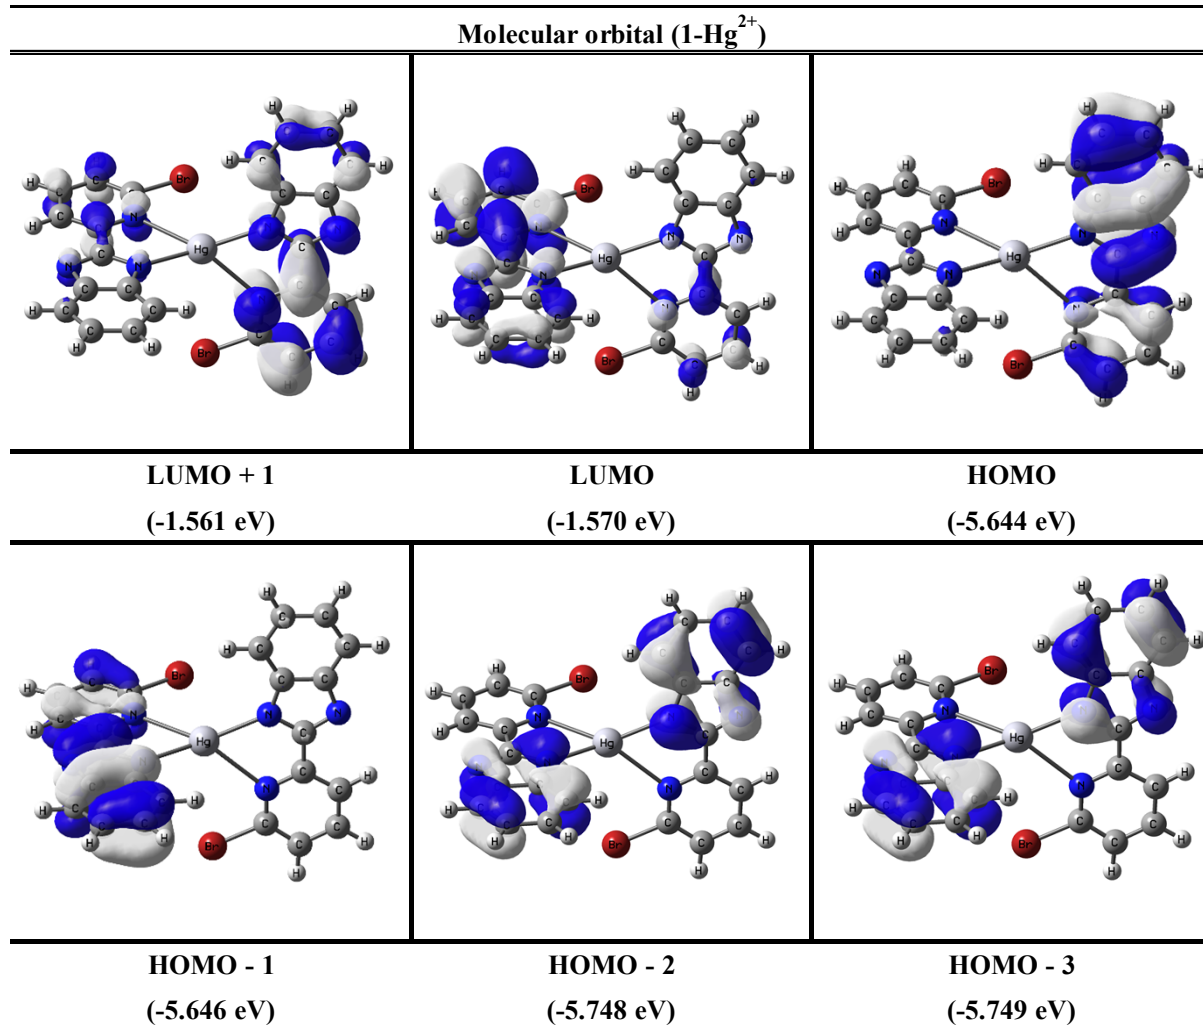

**Fig. S10** (a) The major electronic transition energies and molecular orbital contributions for  $\text{Hg}^{2+}\text{-2}\cdot\mathbf{1}$  complex (H = HOMO and L = LUMO). (b) Isosurface (0.030 electron bohr<sup>-3</sup>) of molecular orbitals participating in the major singlet excited states of  $\text{Hg}^{2+}\text{-2}\cdot\mathbf{1}$  complex.

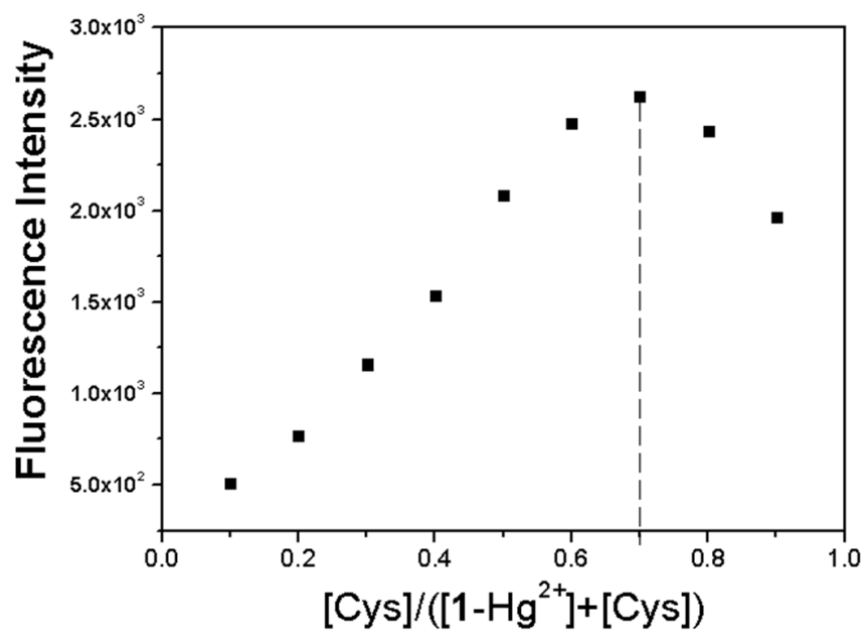

**Fig. S11** Job plot of Hg<sup>2+</sup>-2·1 and Cys in bis-tris buffer solution (10 mM, pH 7.0). The total concentrations of Hg<sup>2+</sup>-2·1 and Cys were 50 μM.

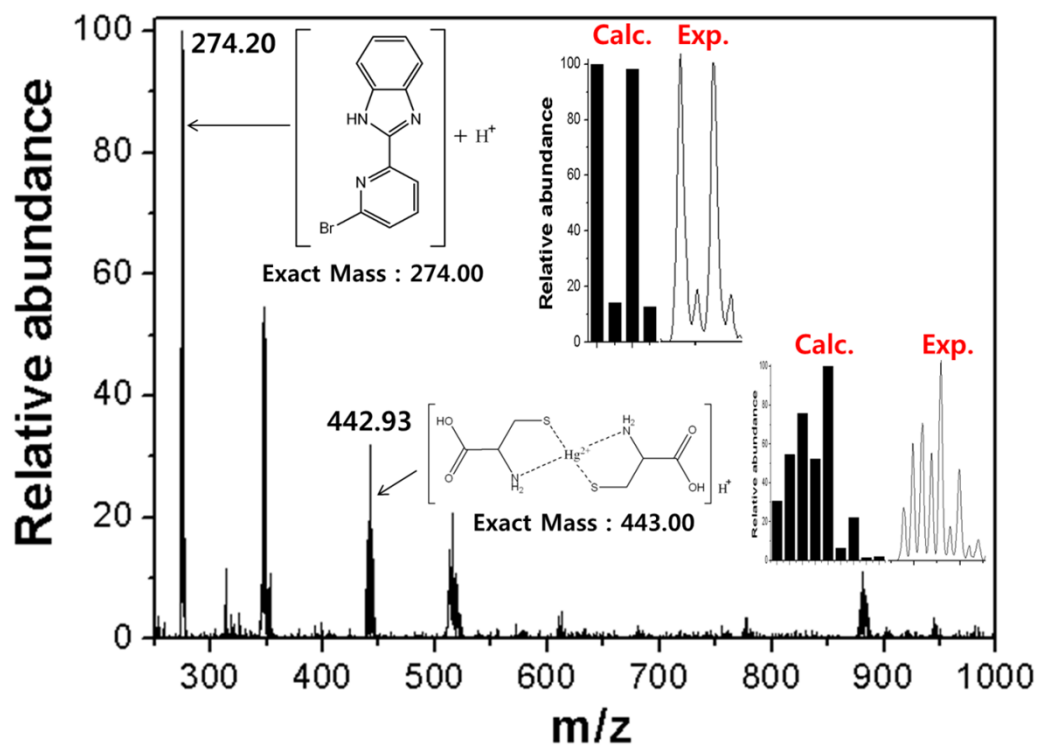

**Fig. S12** Positive-ion electrospray ionization mass spectrum of  $Hg^{2+}$ -**2·1** (50  $\mu$ M) upon addition of 2.0 equiv of Cys.

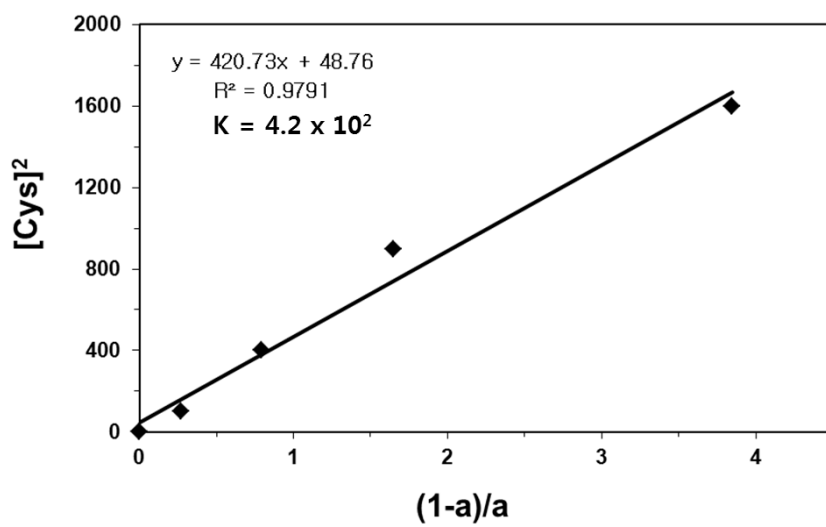

**Fig. S13** Li's equation of  $Hg^{2+} \cdot 2 \cdot 1$  (at 395 nm), assuming 1:2 stoichiometry for association between  $Hg^{2+} \cdot 2 \cdot 1$  and Cys.



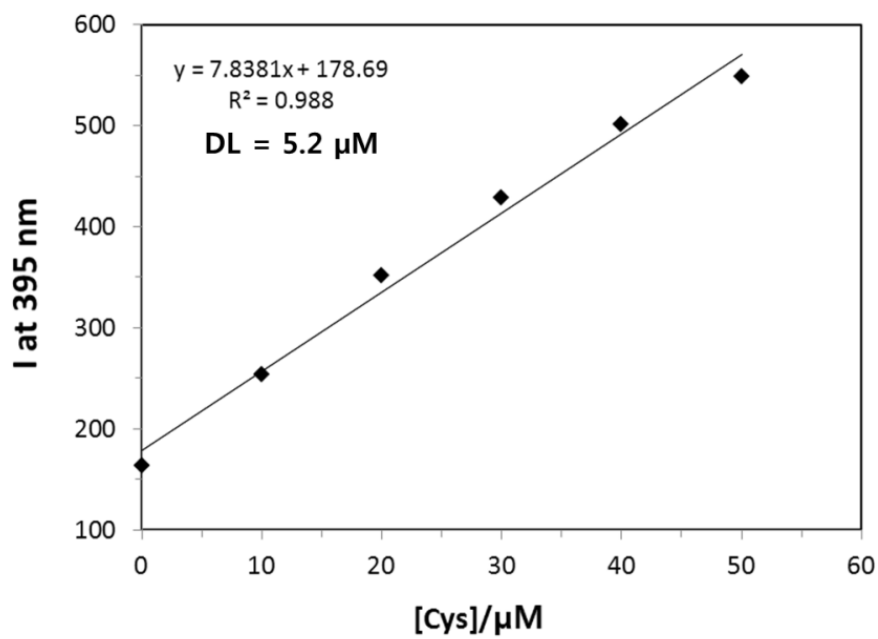

**Fig. S14** Detection limit of  $\text{Hg}^{2+}$ -2·1 (1 μM) for Cys through change of fluorescence intensity.
